# Supplementary material for: Regulation of micropatterned curvature-dependent FA heterogeneity on cytoskeleton tension and nuclear DNA synthesis of malignant breast cancer cells
Source: Royal Society of Chemistry journal article supplement (doi:10.1039/d2tb01774a), 2022-11-26
Supplement: d2tb01774a1.pdf [file d2tb01774a1.pdf]

# Regulation of micropatterned curvature-dependent FA heterogeneity on cytoskeleton tension and nuclear DNA synthesis of malignant breast cancer cells

Yongtao Wang,<sup>\*a&</sup> Nana Wang,<sup>b&</sup> Yazhou Chen,<sup>c</sup> and Yingjun Yang<sup>\*d</sup>

<sup>a</sup>School of Medicine, Shanghai University, Shanghai, 200444, China, Email:  
yongtao\_wang@shu.edu.cn

<sup>b</sup>Department of Pediatrics, Shanghai General Hospital, Shanghai Jiao Tong University, Shanghai,  
200080, China

<sup>c</sup>Medical 3D Printing center, The First Affiliated Hospital of Zhengzhou University, Zhengzhou  
University, Zhengzhou, 450052, China

<sup>d</sup>Materials Institute of Atomic and Molecular Science, Shaanxi University of Science and  
Technology, Xi'an, 710021, China, Email: yang.yingjun@sust.edu.cn

&These authors contributed equally to this work.

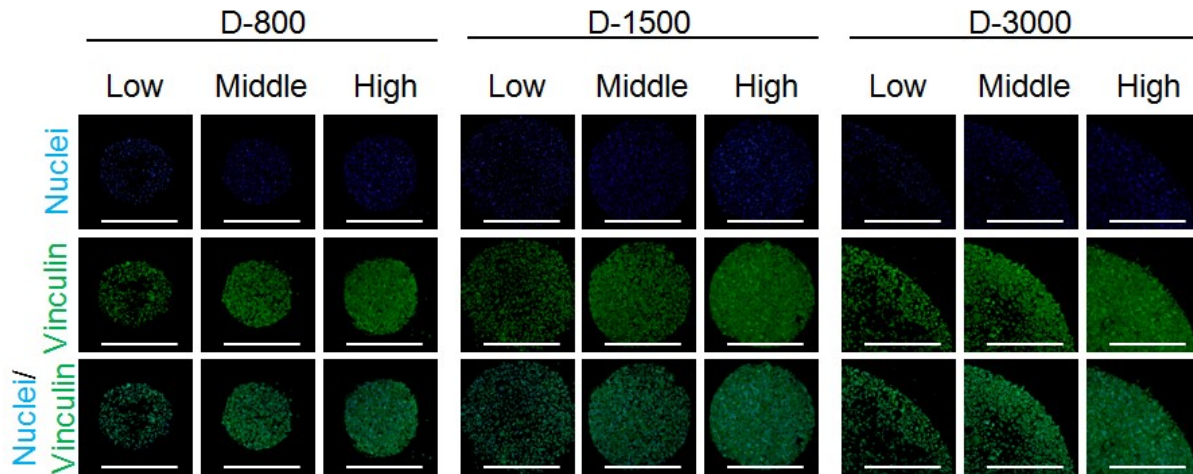

**Fig. S1.** Representative fluorescence images of vinculin (green) and nuclei (blue) staining. The fluorescent images of vinculin and nuclei were merged into one image to show the co-staining feature. Scale bar: 1000  $\mu\text{m}$ .

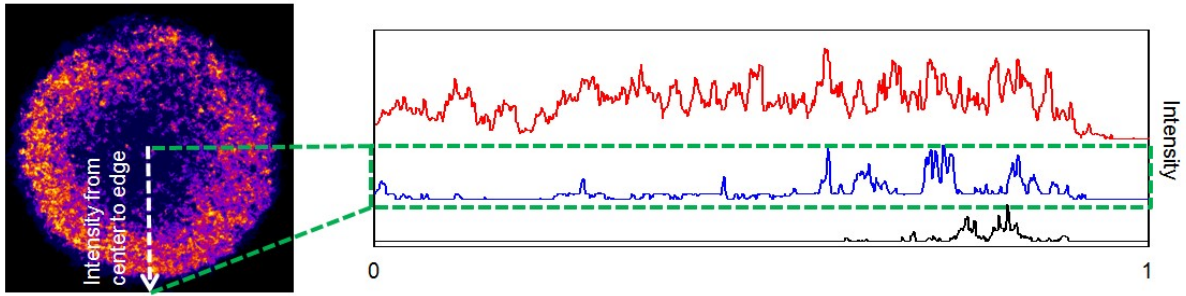

**Fig. S2.** Illustration of myosin heatmap to show the intensity curves of myosin from center to edge of the images.
